# Supplementary material for: Synergy of non-lithium cation doping and the lithium concentration affecting lithium ion transport in solid electrolytes
Source: Royal Society of Chemistry journal article supplement (doi:10.1039/d2ta05010b), 2022-01-01
Supplement: d2ta05010b1.pdf [file d2ta05010b1.pdf]

1 **Supporting Information**

2

3 **Synergy of non-lithium cation doping and lithium concentration**  
4 **affecting lithium ion transport in solid electrolyte**

5 Shihao Feng<sup>a</sup>, Zhixing Wang<sup>a,b,c</sup>, Huajun Guo<sup>a,b,c</sup>, Xinhai Li<sup>a,b,c</sup>, Guochun

6 Yan<sup>a,c</sup>, Qihou Li,<sup>a,\*</sup> Jiexi Wang<sup>a,b,c,\*</sup>

7

8 <sup>a</sup> School of Metallurgy and Environment, Central South University, 410083

9 Changsha, P. R. China

10 <sup>b</sup> Engineering Research Center of the Ministry of Education for Advanced

11 Battery Materials, Central South University, Changsha, 410083, P. R. China

12 <sup>c</sup> Hunan Provincial Key Laboratory of Nonferrous Value-Added Metallurgy,

13 Central South University, Changsha, 410083, P. R. China

14

15 \* Corresponding author, email address: [liqihou@csu.edu.cn](mailto:liqihou@csu.edu.cn) (Q.Li);

16 [wangjiexikeen@csu.edu.cn](mailto:wangjiexikeen@csu.edu.cn) (J.Wang)

17

1 **Table S1.** Calculated lattice parameters of  $\text{Li}_{16-2x}\text{Zn}_x\text{Ge}_4\text{O}_{16}$  and  $\text{Li}_{16-}$   
 2  $_{2x}\text{Mg}_x\text{Ge}_4\text{O}_{16}$  from DFT.

| Composition                                                | cell      | a (Å) | b (Å) | c (Å) | $\alpha$ (°) | $\beta$ (°) | $\gamma$ (°) | Unit cell<br>Volume (Å <sup>3</sup> ) |
|------------------------------------------------------------|-----------|-------|-------|-------|--------------|-------------|--------------|---------------------------------------|
| $\text{Li}_{12}\text{Mg}_2\text{Ge}_4\text{O}_{16}$        | supercell | 10.57 | 12.71 | 10.99 | 90.00        | 90.51       | 89.29        | 1477.03                               |
| $\text{Li}_{14}\text{MgGe}_4\text{O}_{16}$                 | supercell | 10.50 | 12.58 | 10.97 | 90.02        | 90.12       | 90.68        | 1448.86                               |
| $\text{Li}_{15}\text{Mg}_{0.5}\text{Ge}_4\text{O}_{16}$    | supercell | 10.94 | 12.60 | 10.43 | 89.90        | 89.90       | 90.17        | 1437.76                               |
| $\text{Li}_{15.5}\text{Mg}_{0.25}\text{Ge}_4\text{O}_{16}$ | supercell | 10.93 | 12.58 | 10.45 | 89.96        | 89.95       | 90.09        | 1435.30                               |
| $\text{Li}_{12}\text{Zn}_2\text{Ge}_4\text{O}_{16}$        | supercell | 10.58 | 12.62 | 10.99 | 90.04        | 91.08       | 89.85        | 1467.29                               |
| $\text{Li}_{14}\text{ZnGe}_4\text{O}_{16}$                 | supercell | 10.50 | 12.60 | 10.95 | 90.01        | 89.94       | 90.52        | 1449.85                               |
| $\text{Li}_{15}\text{Zn}_{0.5}\text{Ge}_4\text{O}_{16}$    | supercell | 10.91 | 12.56 | 10.43 | 89.95        | 90.27       | 89.93        | 1429.10                               |

3

4

5 **Table S2.** The phase stability and diffusional properties of  $\text{Li}_{16-2x}\text{Zn}_x\text{Ge}_4\text{O}_{16}$   
 6 and  $\text{Li}_{16-2x}\text{Mg}_x\text{Ge}_4\text{O}_{16}$ .

| Composition                                                | $E_{\text{hull}}$ (meV/atom) | $\sigma_{300\text{K}}$ (mS/cm) | $E_a$ (eV) |
|------------------------------------------------------------|------------------------------|--------------------------------|------------|
| $\text{Li}_{12}\text{Zn}_2\text{Ge}_4\text{O}_{16}$        | 15                           | 0.16                           | 0.34       |
| $\text{Li}_{14}\text{ZnGe}_4\text{O}_{16}$                 | 23                           | 2.50                           | 0.27       |
| $\text{Li}_{15}\text{Zn}_{0.5}\text{Ge}_4\text{O}_{16}$    | 27                           | 1.16                           | 0.30       |
| $\text{Li}_{12}\text{Mg}_2\text{Ge}_4\text{O}_{16}$        | 17                           | 0.01                           | 0.42       |
| $\text{Li}_{14}\text{MgGe}_4\text{O}_{16}$                 | 24                           | 0.15                           | 0.35       |
| $\text{Li}_{15}\text{Mg}_{0.5}\text{Ge}_4\text{O}_{16}$    | 28                           | 4.55                           | 0.25       |
| $\text{Li}_{15.5}\text{Mg}_{0.25}\text{Ge}_4\text{O}_{16}$ | 28                           | 3.20                           | 0.27       |

7

8

1 **Table S3.** Calculated lattice parameters of  $\text{Li}_{16-2x}\text{M}_{x/2}\text{Cd}_{x/2}\text{Ge}_4\text{O}_{16}$  (M = Zn, Mg)

2 from DFT.

| Composition                                                              | cell      | a (Å) | b (Å) | c (Å) | $\alpha$ (°) | $\beta$ (°) | $\gamma$ (°) | Unit cell<br>Volume (Å <sup>3</sup> ) |
|--------------------------------------------------------------------------|-----------|-------|-------|-------|--------------|-------------|--------------|---------------------------------------|
| $\text{Li}_{12}\text{MgCdGe}_4\text{O}_{16}$                             | supercell | 10.62 | 12.69 | 11.15 | 90.22        | 90.99       | 89.89        | 1502.16                               |
| $\text{Li}_{14}\text{Mg}_{0.5}\text{Cd}_{0.5}\text{Ge}_4\text{O}_{16}$   | supercell | 10.53 | 12.64 | 11.03 | 89.86        | 89.89       | 90.58        | 1466.96                               |
| $\text{Li}_{15}\text{Mg}_{0.25}\text{Cd}_{0.25}\text{Ge}_4\text{O}_{16}$ | supercell | 10.95 | 12.60 | 10.50 | 89.90        | 90.43       | 89.83        | 1449.10                               |
| $\text{Li}_{12}\text{ZnCdGe}_4\text{O}_{16}$                             | supercell | 10.65 | 12.67 | 11.14 | 90.23        | 90.92       | 90.03        | 1503.62                               |
| $\text{Li}_{14}\text{Zn}_{0.5}\text{Cd}_{0.5}\text{Ge}_4\text{O}_{16}$   | supercell | 10.55 | 12.65 | 11.03 | 89.89        | 89.88       | 90.60        | 1471.75                               |
| $\text{Li}_{15}\text{Zn}_{0.25}\text{Cd}_{0.25}\text{Ge}_4\text{O}_{16}$ | supercell | 10.96 | 12.61 | 10.50 | 89.90        | 90.36       | 89.86        | 1451.04                               |

3

4

5 **Table S4.** The phase stability and diffusional properties of  $\text{Li}_{16-}$

6  $2x\text{M}_{x/2}\text{Cd}_{x/2}\text{Ge}_4\text{O}_{16}$  (M = Zn, Mg).

| Composition                                                              | $E_{\text{hull}}$ (meV/atom) | $\sigma_{300\text{K}}$ (mS/cm) | $E_a$ (eV) |
|--------------------------------------------------------------------------|------------------------------|--------------------------------|------------|
| $\text{Li}_{12}\text{ZnCdGe}_4\text{O}_{16}$                             | 22                           | 1.36                           | 0.27       |
| $\text{Li}_{14}\text{Zn}_{0.5}\text{Cd}_{0.5}\text{Ge}_4\text{O}_{16}$   | 28                           | 2.48                           | 0.27       |
| $\text{Li}_{15}\text{Zn}_{0.25}\text{Cd}_{0.25}\text{Ge}_4\text{O}_{16}$ | 30                           | 1.20                           | 0.30       |
| $\text{Li}_{12}\text{MgCdGe}_4\text{O}_{16}$                             | 23                           | 0.23                           | 0.34       |
| $\text{Li}_{14}\text{Mg}_{0.5}\text{Cd}_{0.5}\text{Ge}_4\text{O}_{16}$   | 28                           | 3.70                           | 0.25       |
| $\text{Li}_{15}\text{Mg}_{0.25}\text{Cd}_{0.25}\text{Ge}_4\text{O}_{16}$ | 30                           | 3.33                           | 0.26       |

7

8

1 **Table S5.** The impact of cation (Cd and Mg) on  $\Delta E_{\text{site}}$  in  $\text{Li}_{14}\text{Zn}_{0.5}\text{Cd}_{0.5}\text{Ge}_4\text{O}_{16}$ .

| Zn_impact                | E(eV)    | Cd_impact                | E(eV)    |
|--------------------------|----------|--------------------------|----------|
| E site                   | -770.623 | F site                   | -770.258 |
| E' site                  | -769.497 | F' site                  | -769.506 |
| $\Delta E_{\text{site}}$ | 1.126    | $\Delta E_{\text{site}}$ | 0.752    |

2

3 **Table S6.** The phase stability and diffusional properties of

4  $\text{Li}_{15}\text{Zn}_{0.25}\text{Mg}_{0.25}\text{Ge}_4\text{O}_{16}$  and  $\text{Li}_{12}\text{MgZnGe}_4\text{O}_{16}$ .

| Composition                                                              | $E_{\text{hull}}$<br>(meV/atom) | $\sigma_{300\text{K}}$ (mS/cm) | $E_a$ (eV) |
|--------------------------------------------------------------------------|---------------------------------|--------------------------------|------------|
| $\text{Li}_{15}\text{Zn}_{0.25}\text{Mg}_{0.25}\text{Ge}_4\text{O}_{16}$ | 27                              | 3.00                           | 0.26       |
| $\text{Li}_{12}\text{MgZnGe}_4\text{O}_{16}$                             | 16                              | 0.09                           | 0.37       |

5

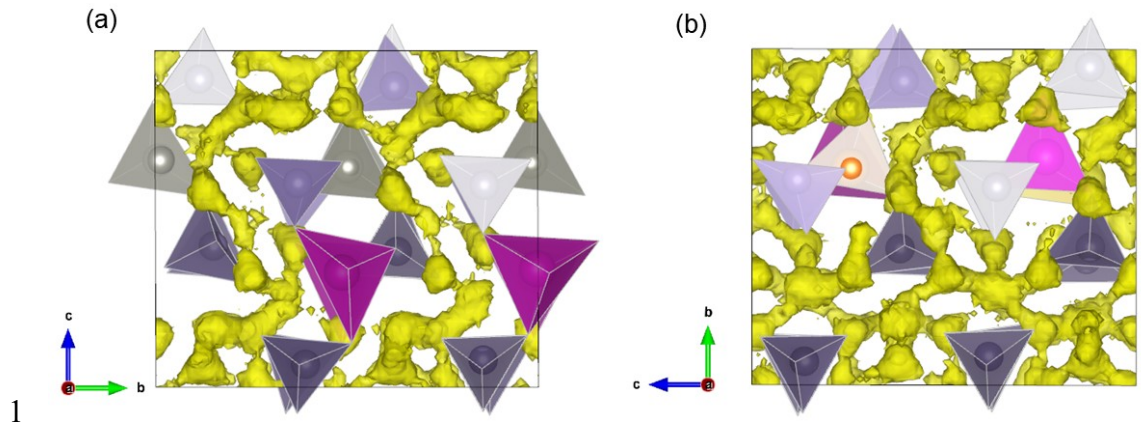

1  
 2 **Figure S1.** The probability densities of Li ions that was calculated by AIMD  
 3 simulations at 900 K (a) in  $\text{Li}_{12}\text{ZnCdGe}_4\text{O}_{16}$  and (b) in  $\text{Li}_{12}\text{MgCdGe}_4\text{O}_{16}$  (yellow  
 4 dots are used to represent the possible positions of lithium ions).

5

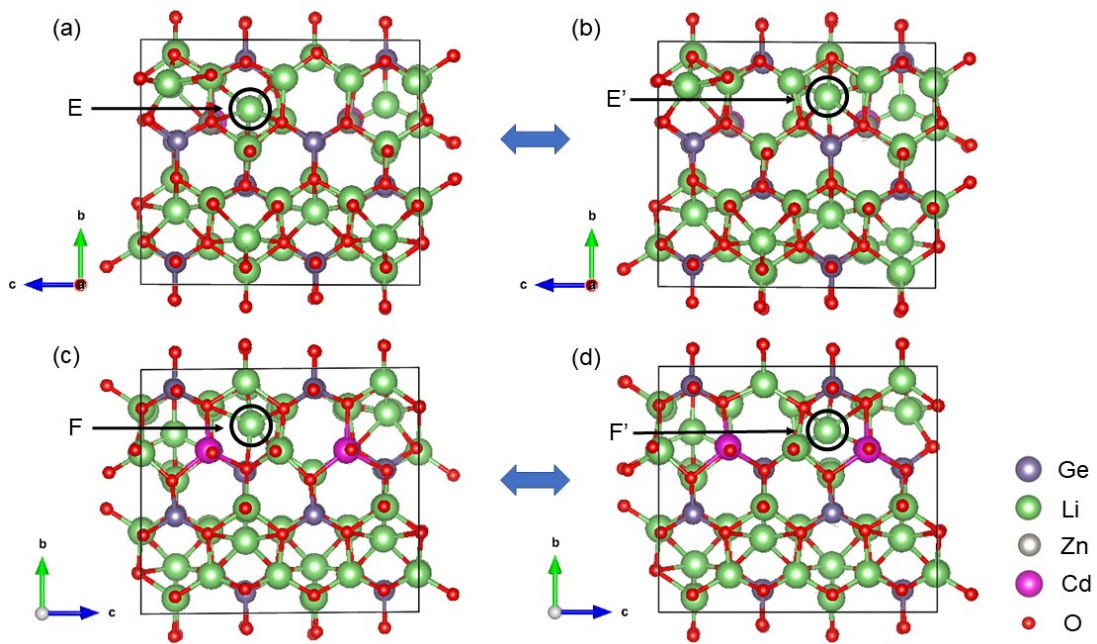

6

7 **Figure S2.** The comparison of Cd and Zn impacts in  $\text{Li}_{14}\text{Zn}_{0.5}\text{Cd}_{0.5}\text{Ge}_4\text{O}_{16}$ . E  
 8 site in (a), E' site in (b), F site in (c), F' site in (d).

9

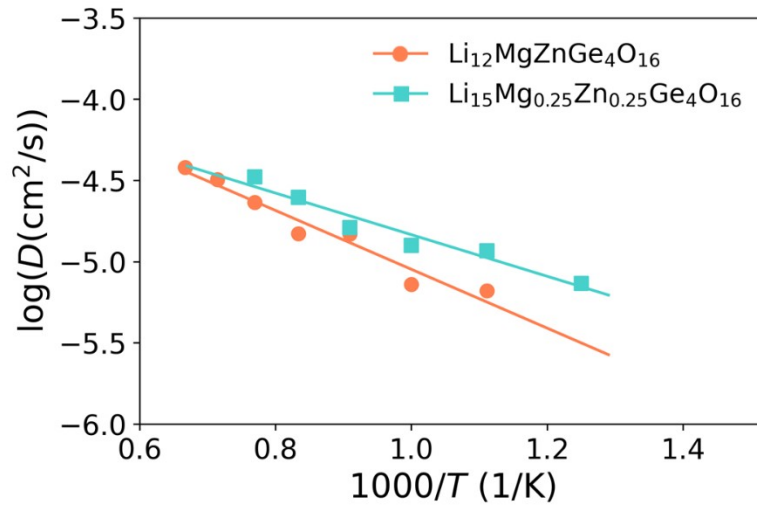

1

2 **Figure S3.** Arrhenius plots of Li ions diffusion in  $\text{Li}_{12}\text{MgZnGe}_4\text{O}_{16}$  and  
 3  $\text{Li}_{15}\text{Mg}_{0.25}\text{Zn}_{0.25}\text{Ge}_4\text{O}_{16}$  from AIMD simulation.

4

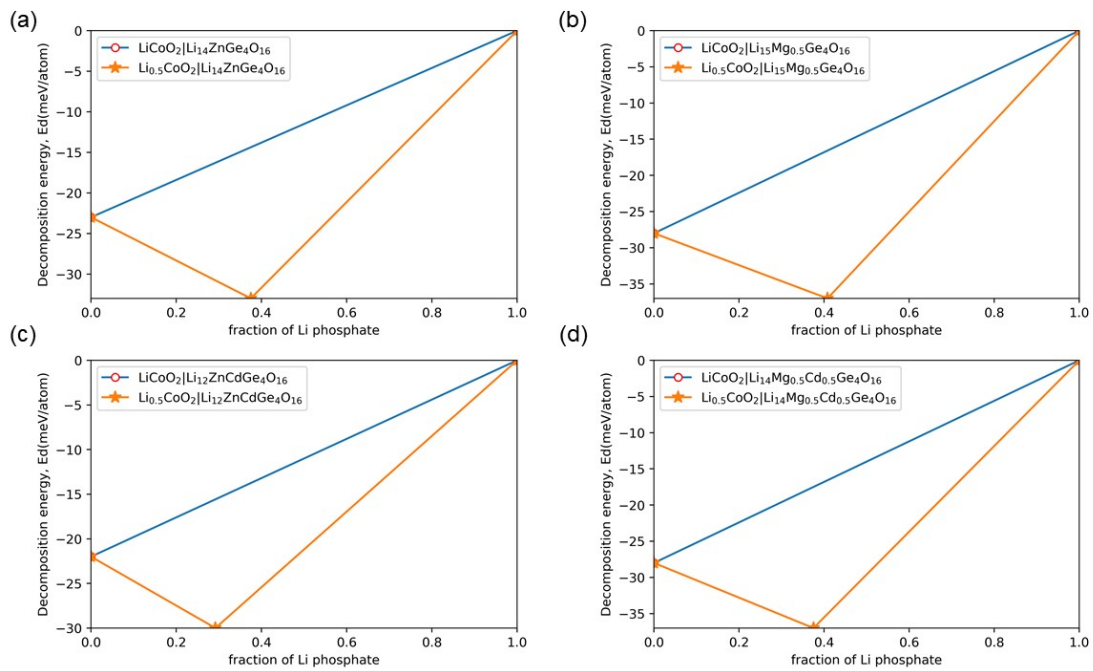

5

6 **Figure S4.** Decomposition energy of between (a) LCO and  $\text{Li}_{14}\text{ZnGe}_4\text{O}_{16}$   
 7 ( $\text{LiCoO}_2$  represents discharging status,  $\text{Li}_{0.5}\text{CoO}_2$  represents charging state);  
 8 (b) LCO and  $\text{Li}_{15}\text{Mg}_{0.5}\text{Ge}_4\text{O}_{16}$ ; (c) LCO and  $\text{Li}_{12}\text{ZnCdGe}_4\text{O}_{16}$ ; (d) LCO and  
 9  $\text{Li}_{14}\text{Mg}_{0.5}\text{Cd}_{0.5}\text{Ge}_4\text{O}_{16}$ .

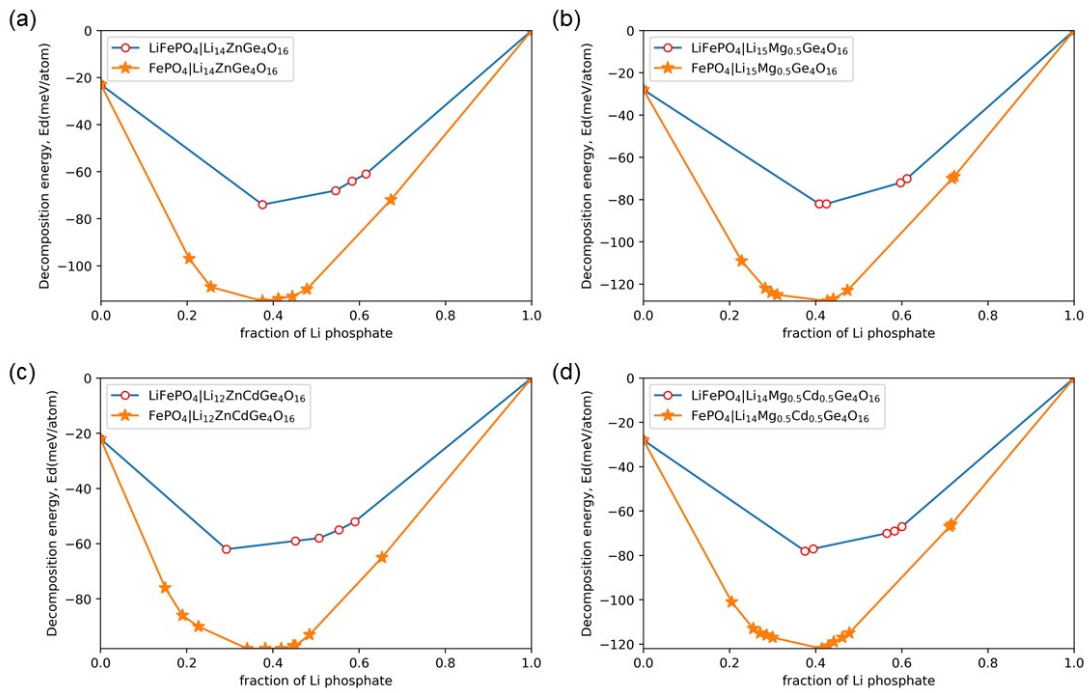

1

2 **Figure S5.** Decomposition energy of between (a) LFPO and  $\text{Li}_{14}\text{ZnGe}_4\text{O}_{16}$   
 3 ( $\text{LiFePO}_4$  represents discharging status,  $\text{FePO}_4$  represents charging state); (b)  
 4 LFPO and  $\text{Li}_{15}\text{Mg}_{0.5}\text{Ge}_4\text{O}_{16}$ ; (c) LFPO and  $\text{Li}_{12}\text{ZnCdGe}_4\text{O}_{16}$ ; (d) LFPO and  
 5  $\text{Li}_{14}\text{Mg}_{0.5}\text{Cd}_{0.5}\text{Ge}_4\text{O}_{16}$ .

6

7

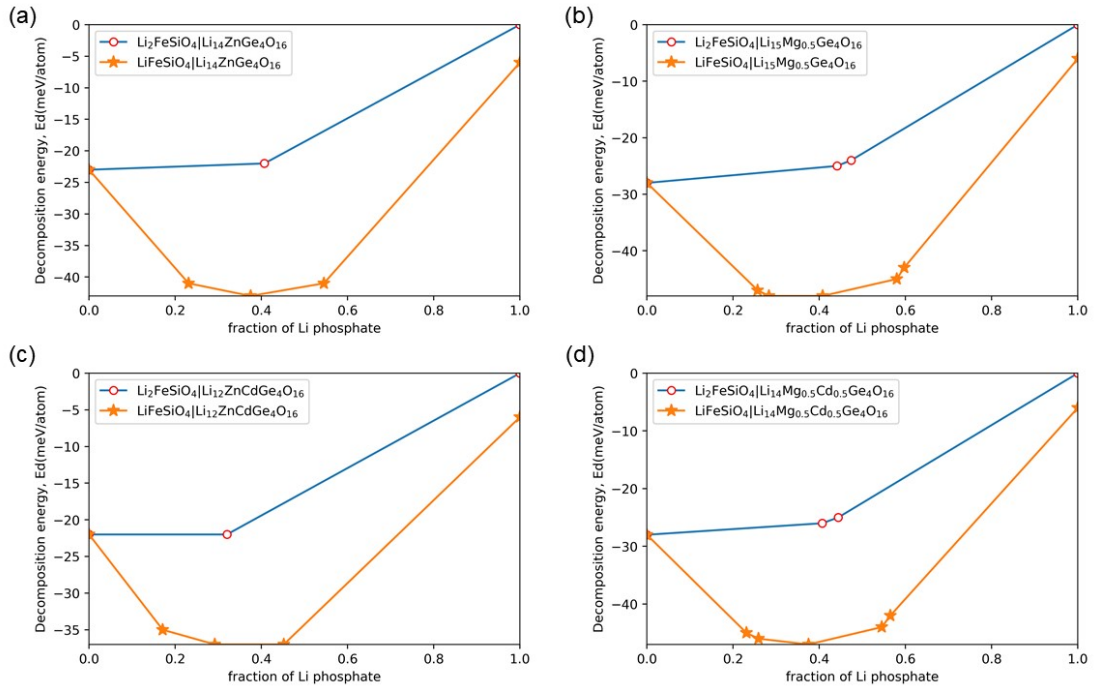

1

2 **Figure S6.** Decomposition energy of between (a) LFSO and  $\text{Li}_{14}\text{ZnGe}_4\text{O}_{16}$

3 ( $\text{Li}_2\text{FeSiO}_4$  represents discharging status,  $\text{LiFeSiO}_4$  represents charging state);

4 (b) LFSO and  $\text{Li}_{15}\text{Mg}_{0.5}\text{Ge}_4\text{O}_{16}$ ; (c) LFSO and  $\text{Li}_{12}\text{ZnCdGe}_4\text{O}_{16}$ ; (d) LFSO and

5  $\text{Li}_{14}\text{Mg}_{0.5}\text{Cd}_{0.5}\text{Ge}_4\text{O}_{16}$ .

6



1 Note 1:

2 In the studies of thio-LISICON type solid electrolyte, when the solid  
3 solution member  $x = 0.75$   $\text{Li}_{4-x}\text{Ge}_{1-x}\text{P}_x\text{S}_4$  shows the highest conductivity,  
4 namely  $\text{Li}_{9.75}\text{Ge}_{0.75}\text{P}_{2.25}\text{S}_{12}$ .<sup>1</sup> Therefore, in theory the lithium-ion concentration  
5 of  $\text{Li}_{10}\text{GeP}_2\text{S}_{12}$  exceeds the optimal value possibly. If further improving the  
6 lithium-ion conductivity of  $\text{Li}_{10}\text{GeP}_2\text{S}_{12}$ , according to we proposed doping  
7 theory, it should be doped with cations with smaller radii. In the study of  
8  $\text{Li}_{10}(\text{Ge}_{1-x}\text{M}_x)\text{P}_2\text{S}_{12}$  ( $\text{M} = \text{Si}, \text{Sn}$ ),  $\text{Li}_{10}\text{Ge}_{0.95}\text{Si}_{0.05}\text{P}_2\text{S}_{12}$  possess slightly higher  
9 lithium-ion conductivity than  $\text{Li}_{10}\text{GeP}_2\text{S}_{12}$  at 300 K. However, doping with  
10 large-radius non-lithium cations would cause the decrease in Li-ion  
11 conductivity. Interestingly, in all Sn-doped materials their lithium-ion  
12 conductivity all are lower than that of  $\text{Li}_{10}\text{GeP}_2\text{S}_{12}$ .<sup>2</sup> Similarly, in experimental  
13 studies of  $\text{Li}_{10}\text{Ge}_{1-x}\text{Sn}_x\text{P}_2\text{S}_{12}$  the similar results were also observed.<sup>3</sup>  
14 Furthermore, based on first-principles calculations, the order of Li-ion  
15 conductivity of these materials is  $\text{Li}_{10}\text{GeP}_2\text{S}_{12} > \text{Li}_{10}\text{SnP}_2\text{S}_{12}$ .<sup>4</sup> Therefore,  
16 based on the above observations, our proposed doping strategies probably  
17 also are applicable to thio-LISICON type solid electrolyte.

18

19

## 1 References

- 2 1 R. Kanno and M. Murayama, *J. Electrochem. Soc.*, 2001, **148**, A742.
- 3 2 Y. Kato, R. Saito, M. Sakano, A. Mitsui, M. Hirayama and R. Kanno, *J.*  
4 *Power Sources*, 2014, **271**, 60-64.
- 5 3 T. Krauskopf, S. P. Culver and W. G. Zeier, *Chem. Mater.*, 2018, **30**,  
6 1791-1798.
- 7 4 S. P. Ong, Y. Mo, W. D. Richards, L. Miara, H. S. Lee and G. Ceder,  
8 *Energy Environ. Sci.*, 2013, **6**, 148-156.
- 9
